# Supplementary material for: Improvement of Resistance to Clubroot Disease in the Ogura CMS Restorer Line R2163 of Brassica napus
Source: MDPI journal article supplement (doi:10.3390/plants11182413), 2022-09-16
Supplement: s1 [file s1]

**Table S1. Primers used in foreground selection**

| <b>Primer</b>       | <b>Sequences</b>        |
|---------------------|-------------------------|
| <b>A08-300F</b>     | GTAGTGCGGGCCACAAAAT     |
| <b>A08-300R</b>     | CACAATGGAGTGTTGAAATTCCT |
| <b>cnu_m090a F</b>  | GCAAAGATCGGCGAAGAAGA    |
| <b>cnu_m090a R</b>  | TGCAGACACATTCGAACAAACA  |
| <b>sau_um353a F</b> | CCCACCTCCTGCTGATTGTA    |
| <b>sau_um353a R</b> | GATTGATCTCCGGTGATTGG    |
| <b>BnRFO-AS2F</b>   | CATGCTTCGATCTCGTCCTTTA  |
| <b>BnRFO-AS2R</b>   | GGTAACAACATCAGGGTGGAGT  |

**Table S2. Result statistics of prospect selection**

| <b>Population</b>              | <b>Total number of samples</b> | <b>Individual plant numbers with resistance and <i>Rfo</i> gene</b> |
|--------------------------------|--------------------------------|---------------------------------------------------------------------|
| BC <sub>1</sub>                | 12                             | 2, 5, 7, 8, 11, 12                                                  |
| BC <sub>1</sub>                | 12                             | 1~5, 7, 8, 10                                                       |
| BC <sub>1</sub>                | 12                             | 2, 7~12                                                             |
| BC <sub>1</sub>                | 12                             | 4, 5, 12                                                            |
| BC <sub>1</sub>                | 12                             | 7, 9                                                                |
| BC <sub>1</sub>                | 12                             | 3, 4, 6, 8, 11, 12                                                  |
| BC <sub>2</sub>                | 21 (6-30~6-50)                 | 44~50                                                               |
| BC <sub>2</sub>                | 19 (6-51~6-69)                 | 53~55, 56~60, 62~64, 65~66, 68                                      |
| BC <sub>3</sub>                | 21 (6-30~6-50)                 | 30~36, 39, 40, 48~50                                                |
| BC <sub>3</sub>                | 19 (6-51~6-69)                 | 52, 54, 59, 61, 62, 64, 67, 68                                      |
| BC <sub>4</sub>                | 15 (1-63~1-77)                 | 64, 65, 70, 73, 74, 77                                              |
| BC <sub>4</sub>                | 16 (2-7~2-22)                  | 11, 12, 17, 20, 22                                                  |
| BC <sub>4</sub>                | 11 (2-23~2-33)                 | 24, 25, 26, 27, 32                                                  |
| BC <sub>4</sub> F <sub>2</sub> | 21 (4-51~4-71)                 | 53, 56, 57, 60, 63~66, 69~71                                        |
| BC <sub>4</sub> F <sub>2</sub> | 19 (4-72~4-90)                 | 72, 73, 75, 76, 79, 82, 83, 87                                      |
| BC <sub>4</sub> F <sub>2</sub> | 19 (4-91~5-15)                 | 4-91, 4-92, 4-94, 5-1, 5-2, 5-5~5-15                                |
| BC <sub>4</sub> F <sub>2</sub> | 19 (5-16~5-34)                 | 18~20, 23, 26, 27, 29, 33, 34                                       |
| BC <sub>4</sub> F <sub>2</sub> | 14 (5-35~5-48)                 | 35, 38, 40, 41, 46                                                  |
| BC <sub>4</sub> F <sub>2</sub> | 21 (5-49~5-69)                 | 50, 52, 53, 57, 60, 62, 63, 66                                      |
| BC <sub>4</sub> F <sub>2</sub> | 25 (5-70~5-94)                 | 70~72, 77, 78, 83, 84, 85, 88, 93                                   |

**Table S3. Result statistics of background selection**

| <b>Population</b> | <b>Individual plants</b> | <b>L</b> | <b>X(g)</b> | <b>PRPG (PRPG= <math>[L+X(g)]/2L*100\%</math>)</b> |
|-------------------|--------------------------|----------|-------------|----------------------------------------------------|
| BC <sub>2</sub>   | 153-1                    | 86       | 34          | 69.77%                                             |
| BC <sub>2</sub>   | 153-2                    | 86       | 45          | 76.16%                                             |
| BC <sub>2</sub>   | 153-3                    | 86       | 52          | 80.23%                                             |
| BC <sub>2</sub>   | 153-4                    | 86       | 44          | 75.58%                                             |
| BC <sub>2</sub>   | 153-5                    | 86       | 57          | 83.14%                                             |
| BC <sub>2</sub>   | 153-6                    | 86       | 39          | 72.67%                                             |
| BC <sub>2</sub>   | 154-1                    | 86       | 52          | 80.23%                                             |
| BC <sub>2</sub>   | 153-2                    | 86       | 45          | 76.16%                                             |
| BC <sub>3</sub>   | CJ49-1                   | 223      | 151         | 83.90%                                             |
| BC <sub>3</sub>   | CJ49-2                   | 223      | 157         | 85.20%                                             |
| BC <sub>3</sub>   | CJ51-1                   | 223      | 172         | 88.60%                                             |
| BC <sub>4</sub>   | 1-64                     | 60       | 59          | 99.17%                                             |
| BC <sub>4</sub>   | 1-65                     | 60       | 58          | 98.33%                                             |
| BC <sub>4</sub>   | 1-70                     | 60       | 56          | 96.67%                                             |
| BC <sub>4</sub>   | 1-73                     | 60       | 42          | 85.00%                                             |
| BC <sub>4</sub>   | 1-74                     | 60       | 56          | 96.67%                                             |
| BC <sub>4</sub>   | 1-77                     | 60       | 59          | 99.17%                                             |
| BC <sub>4</sub>   | 2-11                     | 60       | 59          | 99.17%                                             |
| BC <sub>4</sub>   | 2-12                     | 60       | 5           | 54.17%                                             |
| BC <sub>4</sub>   | 2-20                     | 60       | 59          | 99.17%                                             |
| BC <sub>4</sub>   | 2-22                     | 60       | 54          | 95.00%                                             |
| BC <sub>4</sub>   | 2-24                     | 60       | 59          | 99.17%                                             |
| BC <sub>4</sub>   | 2-25                     | 60       | 56          | 96.67%                                             |
| BC <sub>4</sub>   | 2-26                     | 60       | 59          | 99.17%                                             |
| BC <sub>4</sub>   | 2-27                     | 60       | 54          | 99.17%                                             |
| BC <sub>4</sub>   | 2-32                     | 60       | 59          | 99.17%                                             |

**Table S4. Primers used in background selection**

| <b>Primer</b> | <b>Sequences</b>      |
|---------------|-----------------------|
| EF            | CTCGTAGACTGCGTACC     |
| ER            | CTGACGCATGGTTAA       |
| MF            | GACGATGAGTCCTGA       |
| MR            | TACTCAGGACTCAT        |
| SAF           | CTCGTAGACTGCGTACAAGCT |
| SAR           | TGTACGCAGTCTAC        |
| Taq I-F       | GACGATGAGTCTGTCA      |
| Taq I-R       | CGTGACAGACTCAT        |
| PF            | CTCGTAGACTGCGTACATGCA |
| PR            | TGTACGCAGTCTAC        |
| EA            | GACTGCGTACCAATTCA     |
| EC            | GACTGCGTACGAATT       |
| MG            | GATGAGTCCTGAGTAAG     |
| MC            | GATGAGTCCTGAGTAAC     |
| SA            | GACTGCGTACAAGCTCA     |
| MC            | GATGAGTCCTGAGTAAC     |
| MG            | GATGAGTCCTGAGTAAG     |
| P0            | GACTGCGTACATGCAG      |
| TC            | GATGAGTCTGTACACGAC    |
| TG            | GATGAGTCTGTACACGAG    |

**Table S5. Reaction systems for PCR amplifications**

| Component                | Volume (μL) |
|--------------------------|-------------|
| DNA                      | 2.0         |
| Primer-1                 | 0.3         |
| Primer-2                 | 0.3         |
| Buffer (10x)             | 1.5         |
| Mg <sup>2+</sup> (25 mM) | 1.2         |
| dNTPs (10 mM)            | 0.2         |
| Taq (5 U/μL)             | 0.15        |
| ddH <sub>2</sub> O       | 9.35        |
| Total                    | 15.0        |
